# Supplementary material for: Engineered Adipose-Derived Stem Cells Overexpressing RXFP1 via CRISPR Activation Ameliorate Erectile Dysfunction in Diabetic Rats
Source: MDPI journal article supplement (doi:10.3390/antiox12010171), 2023-01-11
Supplement: s1 [file s1]

## Supplementary Materials

**Supplementary Table S1. The details of the antibodies used in the study.**

|    | Name                   | Abbreviation      | concentration | source                                                |
|----|------------------------|-------------------|---------------|-------------------------------------------------------|
| FC | anti-CD29              | CD29              | 1:200         | 11-0291-80; Invitrogen, Rockford, IL, USA             |
|    | anti-CD31              | CD31              | 1:200         | 555027; BD Biosciences, San Diego, CA, USA            |
|    | anti-CD34              | CD34              | 1:200         | sc-7324; Santa Cruz Biotechnology, Dallas, Texas, USA |
|    | anti-CD45              | CD45              | 1:200         | 11-0461-80; Invitrogen                                |
|    | anti-CD90              | CD90              | 1:200         | 561973; BD Biosciences                                |
|    | anti-CD106             | CD106             | 1:200         | 559229; BD Biosciences                                |
| WB | anti-RXFP1             | RXFP1             | 1:1000        | 44621; Signalway Antibody, MD, USA                    |
|    | anti-RAGE              | RAGE              | 1:500         | 16346-1-AP; Proteintech, Wuhan, China                 |
|    | anti-NOX2              | NOX2              | 1:1000        | BM4576; Boster, Wuhan, China                          |
|    | anti-NOX4              | NOX4              | 1:1000        | BM4135; Boster                                        |
|    | anti-eNOS              | eNOS              | 1:1000        | ab5589; Abcam, Cambridge, MA, USA                     |
|    | anti-nNOS              | nNOS              | 1:1000        | 610309; BD Biosciences                                |
|    | anti-RhoA              | RhoA              | 1:1000        | 10749-1-AP; Proteintech                               |
|    | anti-ROCK1             | ROCK1             | 1:1000        | 21850-1-AP; Proteintech                               |
|    | anti-ROCK2             | ROCK2             | 1:1000        | 21645-1-AP; Proteintech                               |
|    | anti-Bcl-2             | Bcl-2             | 1:1000        | BF9103; Affinity, USA                                 |
|    | anti-Bax               | Bax               | 1:1000        | A5131; Bimake, Houston, TX, USA                       |
|    | anti-Bad               | Bad               | 1:1000        | A5147; Bimake                                         |
|    | anti-Caspase-3         | Caspase-3         | 1:1000        | A19654; ABclonal, Wuhan, China                        |
|    | anti-Cleaved Caspase-3 | Cleaved Caspase-3 | 1:1000        | A19654; ABclonal                                      |
|    | anti-TGF- $\beta$ 1    | TGF- $\beta$ 1    | 1:1000        | 21898-1-AP; Proteintech                               |
|    | anti-Smad2/3           | Smad2/3           | 1:1000        | 8685S; Cell Signaling Technology, Danvers, MA, USA    |
|    | anti-CTGF              | CTGF              | 1:500         | 23936-1-AP; Proteintech                               |
|    | anti-Collagen I        | Collagen I        | 1:1000        | 14695-1-AP; Proteintech                               |
|    | anti-Collagen III      | Collagen III      | 1:500         | M00788; Boster                                        |
|    | anti- $\alpha$ -SMA    | $\alpha$ -SMA     | 1:1000        | GB111364; Servicebio, Wuhan, China                    |

|     |                      |                |        |                         |
|-----|----------------------|----------------|--------|-------------------------|
| IHC | anti- $\beta$ -actin | $\beta$ -actin | 1:1000 | GB11001; Servicebio     |
|     | anti-RLX-2           | RLX-2          | 1:50   | A6969; ABclonal         |
|     | anti-NOX2            | NOX2           | 1:500  | 19013-1-AP; Proteintech |
|     | anti-ROCK1           | ROCK1          | 1:200  | 21850-1-AP; Proteintech |
|     | anti-ROCK2           | ROCK2          | 1:200  | 21645-1-AP; Proteintech |
|     | anti-TGF $\beta$ 1   | TGF $\beta$ 1  | 1:300  | 21898-1-AP; Proteintech |
| IF  | anti-RXFP1           | RXFP1          | 1:200  | 18419-1-AP; Proteintech |
|     | anti-vWF             | vWF            | 1:100  | GB11020; Servicebio     |
|     | anti- $\alpha$ -SMA  | $\alpha$ -SMA  | 1:500  | GB111364; Servicebio    |
|     | anti-eNOS            | eNOS           | 1:100  | AF0096; Affinity        |
|     | anti-nNOS            | nNOS           | 1:200  | GB11145; Servicebio     |
|     | anti-CD31            | CD31           | 1:100  | GB113151; Servicebio    |

FC = flow cytometry; WB = western blotting; IHC = immunohistochemistry; IF = immunofluorescence

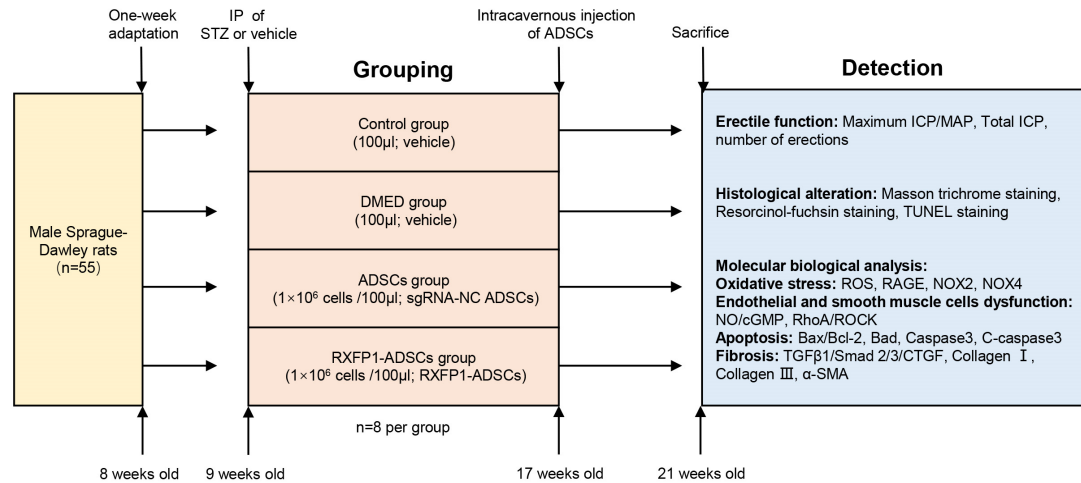

**Supplementary Figure S1. Flow Diagram of Experimental Design.** ADSCs overexpressing RXFP1 by transfection of lentiviruses with the CRISPR activation system were first prepared and validated. The sequence of sgRNA2 was the most efficient and used for subsequent animal experiments. After one-week adaptation, type 1 diabetic rats were constructed by intraperitoneal injection of 1% STZ (60mg/kg). After 8 weeks, all DMED rats and the remaining 8 normal rats were divided into 4 groups and received intracavernous injection: control group (vehicle), DMED group (vehicle), ADSCs group (1×10<sup>6</sup> cells /100μl; sgRNA-NC ADSCs), RXFP1-ADSCs group (1×10<sup>6</sup> cells /100μl; RXFP1-ADSCs). After another 4 weeks, erectile function was examined in all rats and the corpus cavernosum was collected for subsequent detection for histological and molecular biological analysis. IP = intraperitoneal injection; STZ = streptozotocin; DMED = diabetes mellitus-induced erectile dysfunction; ADSCs = adipose-derived stem cells; sgRNA = single guide RNA; RXFP1 = relaxin family peptide receptor 1.

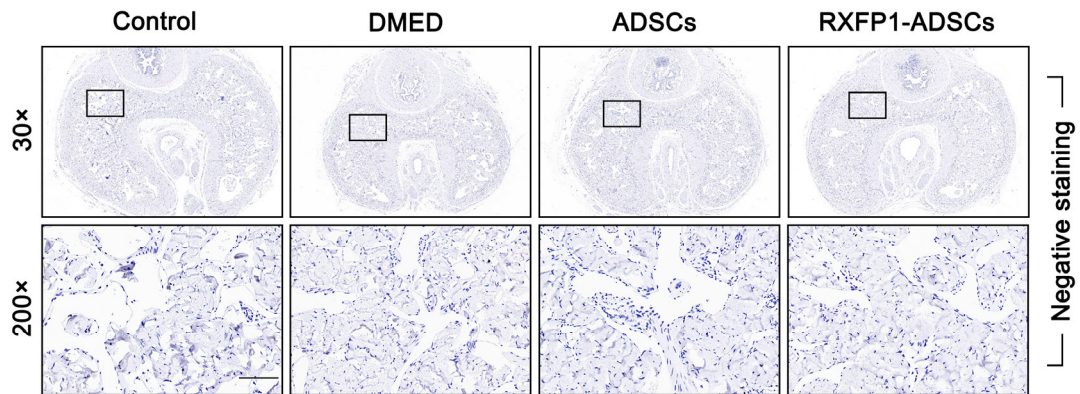

**Supplementary Figure S2.** Negative controls of immunohistochemistry ( $\times 30$  and  $\times 200$ , bars = 100  $\mu\text{m}$ ) in each group. DMED = diabetes mellitus-induced erectile dysfunction; ADSCs = adipose-derived stem cells; RXFP1 = relaxin family peptide receptor 1.

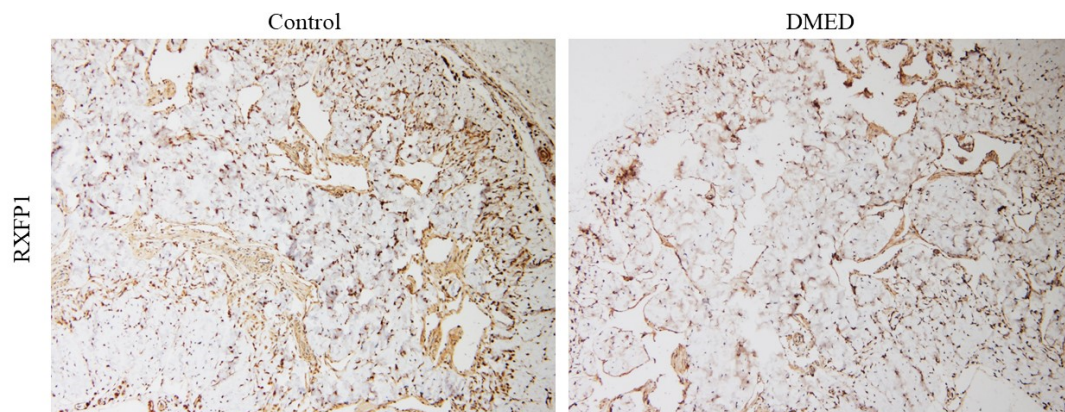

**Supplementary Figure S3.** The expression of RXFP1 in the penis of rats. Representative immunohistochemistry ( $\times 100$ ) of RXFP1 in penis of the 2 groups. DMED = diabetes mellitus-induced erectile dysfunction; RXFP1 = relaxin family peptide receptor 1.
